# Supplementary material for: Phenolics lie at the centre of functional versatility in the responses of two phytochemically diverse tropical trees to canopy thinning
Source: PubMed Central journal article supplement — J Exp Bot. 2019 Jun 28;70(20):5853–64. doi: 10.1093/jxb/erz308 (PMC6812699; doi:10.1093/jxb/erz308), 2019-06-28
Supplement: erz308_suppl_supplementary_tables_s1-s3_figures_s1-s4.pdf [file erz308_suppl_supplementary_tables_s1-s3_figures_s1-s4.pdf]

Phenolics lie at the center of functional versatility in the responses of two phytochemically diverse tropical trees to canopy thinning

Supplementary data

**Table S1.** BLAST® ITS sequence matches for field-collected fungal pathogen. GenBank IDs of matches identified as belonging to the genus *Colletotrichum* are highlighted. All others are listed in GenBank as unidentified fungal endophytes.

| GenBank ID | Sequence match % | Alignment length | Mismatches | Gaps | Accession sequence length | Bit score |
|------------|------------------|------------------|------------|------|---------------------------|-----------|
| KF436296.1 | 100              | 1041             | 0          | 0    | 1052                      | 1923      |
| KF436293.1 | 100              | 1041             | 0          | 0    | 1048                      | 1923      |
| KF436255.1 | 100              | 1041             | 0          | 0    | 1058                      | 1923      |
| KF436248.1 | 100              | 1041             | 0          | 0    | 1045                      | 1923      |
| KF436210.1 | 100              | 1041             | 0          | 0    | 1050                      | 1923      |
| KF436156.1 | 100              | 1041             | 0          | 0    | 1045                      | 1923      |
| KF435937.1 | 100              | 1041             | 0          | 0    | 1054                      | 1923      |
| KF435866.1 | 100              | 1041             | 0          | 0    | 1049                      | 1923      |
| KF435862.1 | 100              | 1041             | 0          | 0    | 1044                      | 1923      |
| KF435591.1 | 100              | 1041             | 0          | 0    | 1048                      | 1923      |
| KF435383.1 | 100              | 1041             | 0          | 0    | 1045                      | 1923      |
| EU687143.1 | 100              | 1041             | 0          | 0    | 1042                      | 1923      |
| EU687077.1 | 100              | 1041             | 0          | 0    | 1045                      | 1923      |
| EU687086.1 | 100              | 1041             | 0          | 0    | 1056                      | 1923      |
| EU686906.1 | 100              | 1041             | 0          | 0    | 1055                      | 1923      |
| EU686865.1 | 100              | 1041             | 0          | 0    | 1055                      | 1923      |
| EU686825.1 | 100              | 1041             | 0          | 0    | 1055                      | 1923      |
| EU686799.1 | 100              | 1041             | 0          | 0    | 1050                      | 1923      |

|            |        |      |   |   |      |      |
|------------|--------|------|---|---|------|------|
| KF436303.1 | 100    | 1040 | 0 | 0 | 1057 | 1921 |
| KF436290.1 | 100    | 1040 | 0 | 0 | 1054 | 1921 |
| KF435173.1 | 100    | 1040 | 0 | 0 | 1053 | 1921 |
| KU977781.1 | 99.904 | 1042 | 0 | 1 | 1046 | 1917 |
| KU977778.1 | 99.904 | 1042 | 0 | 1 | 1051 | 1917 |
| KU747842.1 | 99.904 | 1042 | 0 | 1 | 1046 | 1917 |
| KF436345.1 | 99.904 | 1042 | 0 | 1 | 1051 | 1917 |
| KF436318.1 | 99.904 | 1042 | 0 | 1 | 1055 | 1917 |
| KF436246.1 | 100    | 1038 | 0 | 0 | 1038 | 1917 |
| KF436168.1 | 99.904 | 1042 | 0 | 1 | 1045 | 1917 |
| KF436025.1 | 99.904 | 1041 | 1 | 0 | 1053 | 1917 |
| KF435977.1 | 99.904 | 1042 | 0 | 1 | 1050 | 1917 |
| KF435935.1 | 99.904 | 1042 | 0 | 1 | 1051 | 1917 |
| KF435813.1 | 99.904 | 1042 | 0 | 1 | 1045 | 1917 |
| KF435399.1 | 99.904 | 1042 | 0 | 1 | 1046 | 1917 |
| KF435359.1 | 99.904 | 1042 | 0 | 1 | 1049 | 1917 |
| KF435207.1 | 99.904 | 1042 | 0 | 1 | 1046 | 1917 |
| KF435153.1 | 99.904 | 1042 | 0 | 1 | 1046 | 1917 |
| EU687103.1 | 99.904 | 1042 | 0 | 1 | 1056 | 1917 |
| EU686951.1 | 99.904 | 1042 | 0 | 1 | 1046 | 1917 |
| EU686963.1 | 100    | 1038 | 0 | 0 | 1038 | 1917 |
| KF435607.1 | 99.904 | 1041 | 0 | 1 | 1055 | 1916 |
| KF435579.1 | 99.904 | 1040 | 1 | 0 | 1044 | 1916 |
| KF435328.1 | 99.904 | 1041 | 0 | 1 | 1045 | 1916 |

|            |        |      |   |   |      |      |
|------------|--------|------|---|---|------|------|
| KF435190.1 | 99.904 | 1040 | 1 | 0 | 1044 | 1916 |
| EU687101.1 | 99.904 | 1041 | 0 | 1 | 1054 | 1916 |
| KU747940.1 | 100    | 1036 | 0 | 0 | 1036 | 1914 |
| KU747802.1 | 100    | 1036 | 0 | 0 | 1036 | 1914 |
| KF435335.1 | 100    | 1036 | 0 | 0 | 1036 | 1914 |
| KF435199.1 | 100    | 1036 | 0 | 0 | 1036 | 1914 |
| KF436355.1 | 99.808 | 1041 | 2 | 0 | 1050 | 1912 |
| KF435434.1 | 99.808 | 1042 | 1 | 1 | 1054 | 1912 |
| KF435297.1 | 99.808 | 1042 | 0 | 2 | 1048 | 1912 |
| EU687083.1 | 99.904 | 1039 | 0 | 1 | 1039 | 1912 |
| EU687080.1 | 99.808 | 1042 | 1 | 1 | 1056 | 1912 |
| EU552111.1 | 99.808 | 1042 | 1 | 1 | 1190 | 1912 |
| EU379556.1 | 99.808 | 1042 | 1 | 1 | 1047 | 1912 |
| EF221830.1 | 99.808 | 1042 | 1 | 1 | 1057 | 1912 |
| EF424484.1 | 99.808 | 1042 | 1 | 1 | 1063 | 1912 |
| AJ301908.1 | 99.808 | 1042 | 1 | 1 | 2804 | 1912 |
| KU747653.1 | 99.808 | 1041 | 1 | 1 | 1049 | 1910 |
| KU747552.1 | 99.808 | 1040 | 2 | 0 | 1057 | 1910 |
| KF436301.1 | 99.903 | 1036 | 1 | 0 | 1036 | 1908 |
| KF435883.1 | 99.903 | 1036 | 1 | 0 | 1036 | 1908 |
| KF435775.1 | 99.904 | 1037 | 0 | 1 | 1037 | 1908 |
| KF435580.1 | 99.903 | 1036 | 1 | 0 | 1036 | 1908 |
| KF435409.1 | 99.904 | 1037 | 0 | 1 | 1037 | 1908 |
| KF435323.1 | 99.904 | 1037 | 0 | 1 | 1037 | 1908 |

|            |        |      |   |   |      |      |
|------------|--------|------|---|---|------|------|
| AB710144.1 | 99.712 | 1041 | 3 | 0 | 1060 | 1906 |
| EU686786.1 | 99.712 | 1041 | 3 | 0 | 1055 | 1906 |
| EU686752.1 | 99.712 | 1042 | 1 | 2 | 1055 | 1906 |
| EF221829.1 | 99.712 | 1042 | 2 | 1 | 1057 | 1906 |
| KF435485.1 | 99.712 | 1041 | 2 | 1 | 1044 | 1905 |
| EU379557.1 | 99.807 | 1038 | 1 | 1 | 1038 | 1905 |
| KU747679.1 | 99.807 | 1037 | 1 | 1 | 1037 | 1903 |
| KF436244.1 | 99.616 | 1042 | 3 | 1 | 1046 | 1901 |
| AJ301909.1 | 99.616 | 1042 | 3 | 1 | 2804 | 1901 |
| KF436326.1 | 99.616 | 1041 | 3 | 1 | 1049 | 1899 |
| KF436242.1 | 99.616 | 1041 | 3 | 1 | 1048 | 1899 |
| KF436238.1 | 99.616 | 1041 | 3 | 1 | 1045 | 1899 |
| KF436117.1 | 99.616 | 1041 | 3 | 1 | 1044 | 1899 |
| KF435699.1 | 100    | 1028 | 0 | 0 | 1028 | 1899 |
| KF435615.1 | 99.616 | 1041 | 3 | 1 | 1044 | 1899 |
| KF435549.1 | 99.616 | 1041 | 3 | 1 | 1052 | 1899 |
| KF435444.1 | 99.616 | 1041 | 3 | 1 | 1045 | 1899 |
| EU686947.1 | 99.616 | 1041 | 3 | 1 | 1055 | 1899 |
| EU294268.1 | 99.711 | 1038 | 2 | 1 | 1038 | 1899 |
| KF436330.1 | 99.711 | 1037 | 2 | 1 | 1037 | 1897 |
| KF435872.1 | 100    | 1027 | 0 | 0 | 1027 | 1897 |
| KF435869.1 | 100    | 1027 | 0 | 0 | 1027 | 1897 |
| KF435350.1 | 99.615 | 1040 | 3 | 1 | 1054 | 1897 |
| KF435326.1 | 99.615 | 1040 | 3 | 1 | 1048 | 1897 |

|            |        |      |   |   |      |      |
|------------|--------|------|---|---|------|------|
| JQ747666.1 | 99.615 | 1040 | 2 | 2 | 1057 | 1897 |
| JX131331.1 | 99.52  | 1042 | 4 | 1 | 1091 | 1895 |
| AJ301986.1 | 99.52  | 1042 | 4 | 1 | 1420 | 1895 |
| AJ301977.1 | 99.52  | 1041 | 5 | 0 | 1812 | 1895 |
| KF436343.1 | 99.52  | 1041 | 4 | 1 | 1049 | 1893 |
| KF436305.1 | 99.52  | 1041 | 3 | 2 | 1044 | 1893 |
| KF436106.1 | 99.52  | 1041 | 3 | 2 | 1044 | 1893 |
| KF436077.1 | 99.52  | 1041 | 3 | 2 | 1044 | 1893 |
| KF436402.1 | 99.903 | 1027 | 1 | 0 | 1027 | 1892 |
| KF436348.1 | 99.903 | 1028 | 0 | 1 | 1028 | 1892 |

Table S2. Angle of midrib with the horizon for expanding and mature leaves of *A. blackiana* and *B. utile*. Measurements are from pairs of expanding and mature leaves collected simultaneously from the same individual. Sample size for each light treatment was  $\geq 7$  individuals for both species.

|                                               | <i>A. blackiana</i>                        |                                       | <i>B. utile</i>                            |                                      |
|-----------------------------------------------|--------------------------------------------|---------------------------------------|--------------------------------------------|--------------------------------------|
|                                               | Expanding leaves                           | Mature leaves                         | Expanding leaves                           | Mature leaves                        |
| Angle of midrib with horizon (mean $\pm$ SEM) | 19 $\pm$ 1.9°                              | 13 $\pm$ 1.2°                         | 74 $\pm$ 2.0°                              | 17 $\pm$ 1.9°                        |
| Comparison across leaf age                    | Paired Wilcoxon test<br>P < 0.001, V = 462 |                                       | Paired t-test<br>P < 0.001, t(34) = 38.488 |                                      |
| Comparison across treatments                  | ANOVA<br>P = 0.110,<br>F(1,40) = 2.666     | ANOVA<br>P = 0.609<br>F(1,40) = 0.266 | ANOVA<br>P = 0.102<br>F(1,33) = 2.837      | ANOVA<br>P = 0.252<br>F(1,33) = 1.36 |

Table S3. Compounds associated with increased fungal inhibition. All compounds included exhibited significant ( $P < 0.05$ ) fold-changes across the treatment comparisons listed, indicating an association with fungal growth inhibition. All statistical tests are Tukey's HSD.

| <b><i>A. blackiana</i> expanding leaves</b> |                        |                                    |                                    |
|---------------------------------------------|------------------------|------------------------------------|------------------------------------|
| <i>m/z</i> [M-H] <sup>-</sup>               | Chemical class         | Fold-change (P-value),<br>SF/USUF+ | Fold-change (P-value),<br>SF/USUV- |
| 387.1657                                    | Hydroxybenzoic acid    | N/A                                | 4.7 (0.015)                        |
| <b><i>A. blackiana</i> mature leaves</b>    |                        |                                    |                                    |
| 236.0976                                    | Alkaloid, phenol-based | 5.9(0.010)                         | N/A                                |
| 242.1764                                    | Alkaloid, phenol-based | 5.1 (0.002)                        | N/A                                |
| 497.3333                                    | Alkaloid, phenol-based | 10.2 (0.004)                       | N/A                                |

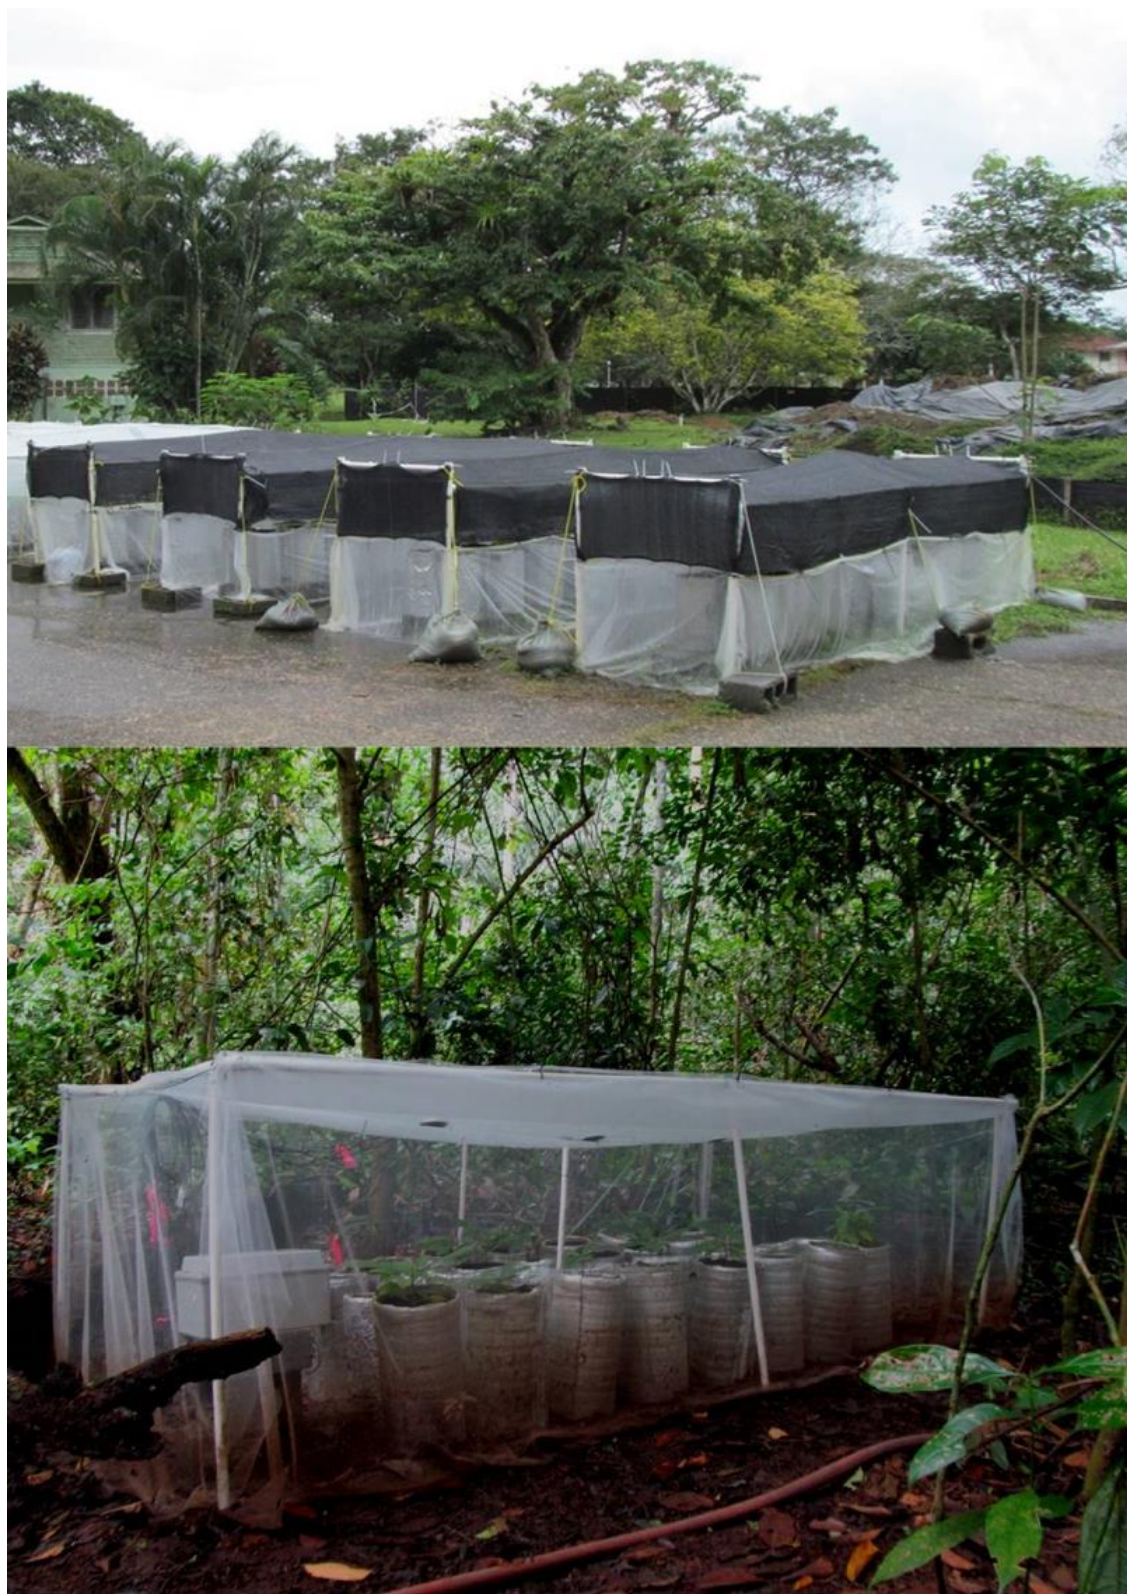

Figure S1. Experimental treatments. Top: Treatments USUV+ and USUV-; bottom: Treatment SF.

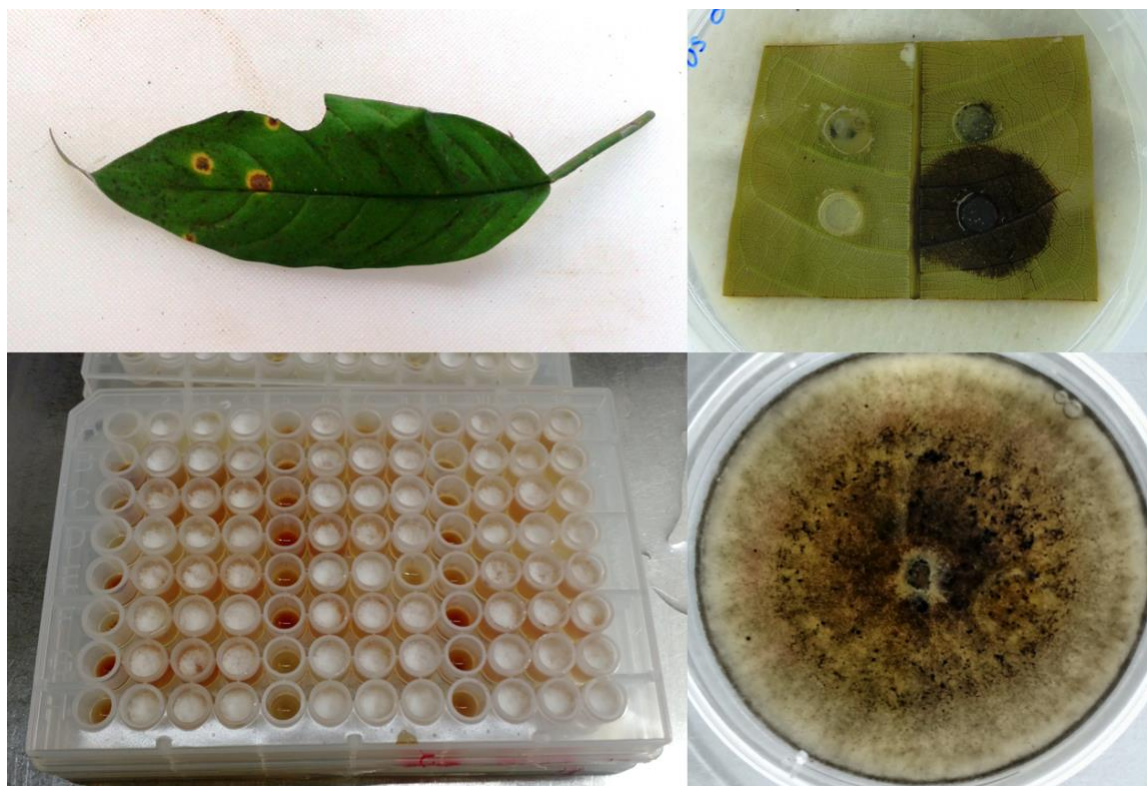

Figure S2. Fungal pathogen isolation and bioassays. Clockwise from top left: collection source; inoculations to verify pathogenicity; isolated culture; bioassay arrangement. First two photos by Mariana Franco.



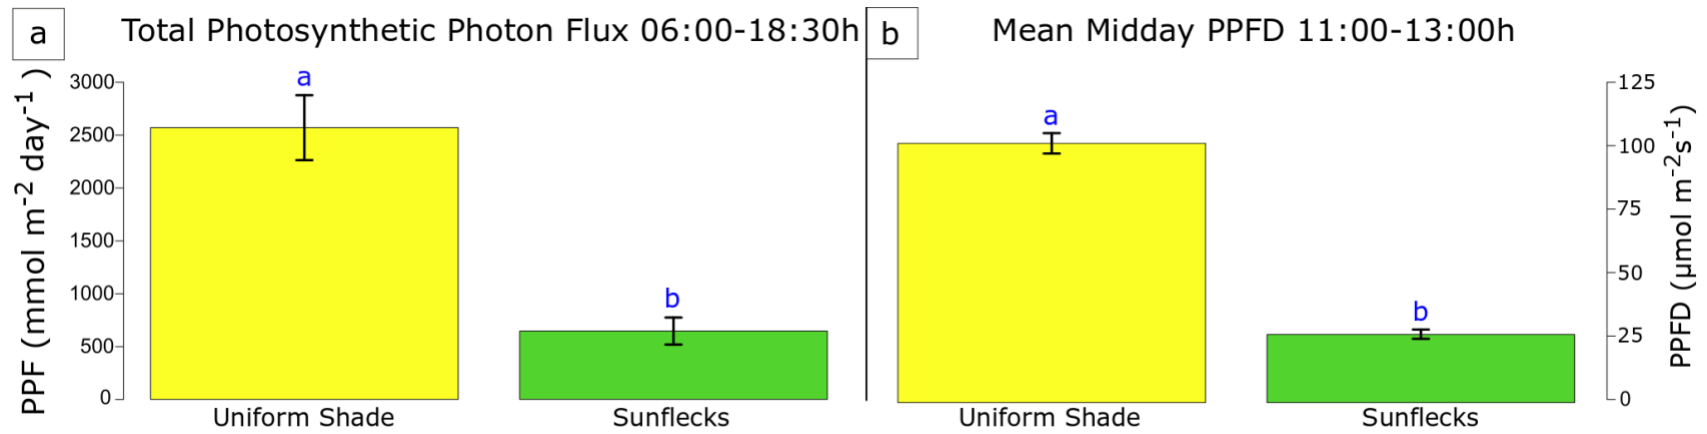

Figure S3. PAR conditions in uniform shade vs. sunfleck treatments, recorded 31 August – 17 September 2014. PAR conditions in high UVB and low UVB uniform shade treatments did not differ significantly; data shown are from the high UVB treatment. Significant differences between treatments at  $P < 0.05$  are indicated by non-matching letters above error bars. Error bars indicate 95% confidence intervals.

## *Alseis blackiana* High UV Uniform Shade, Expanding Leaf

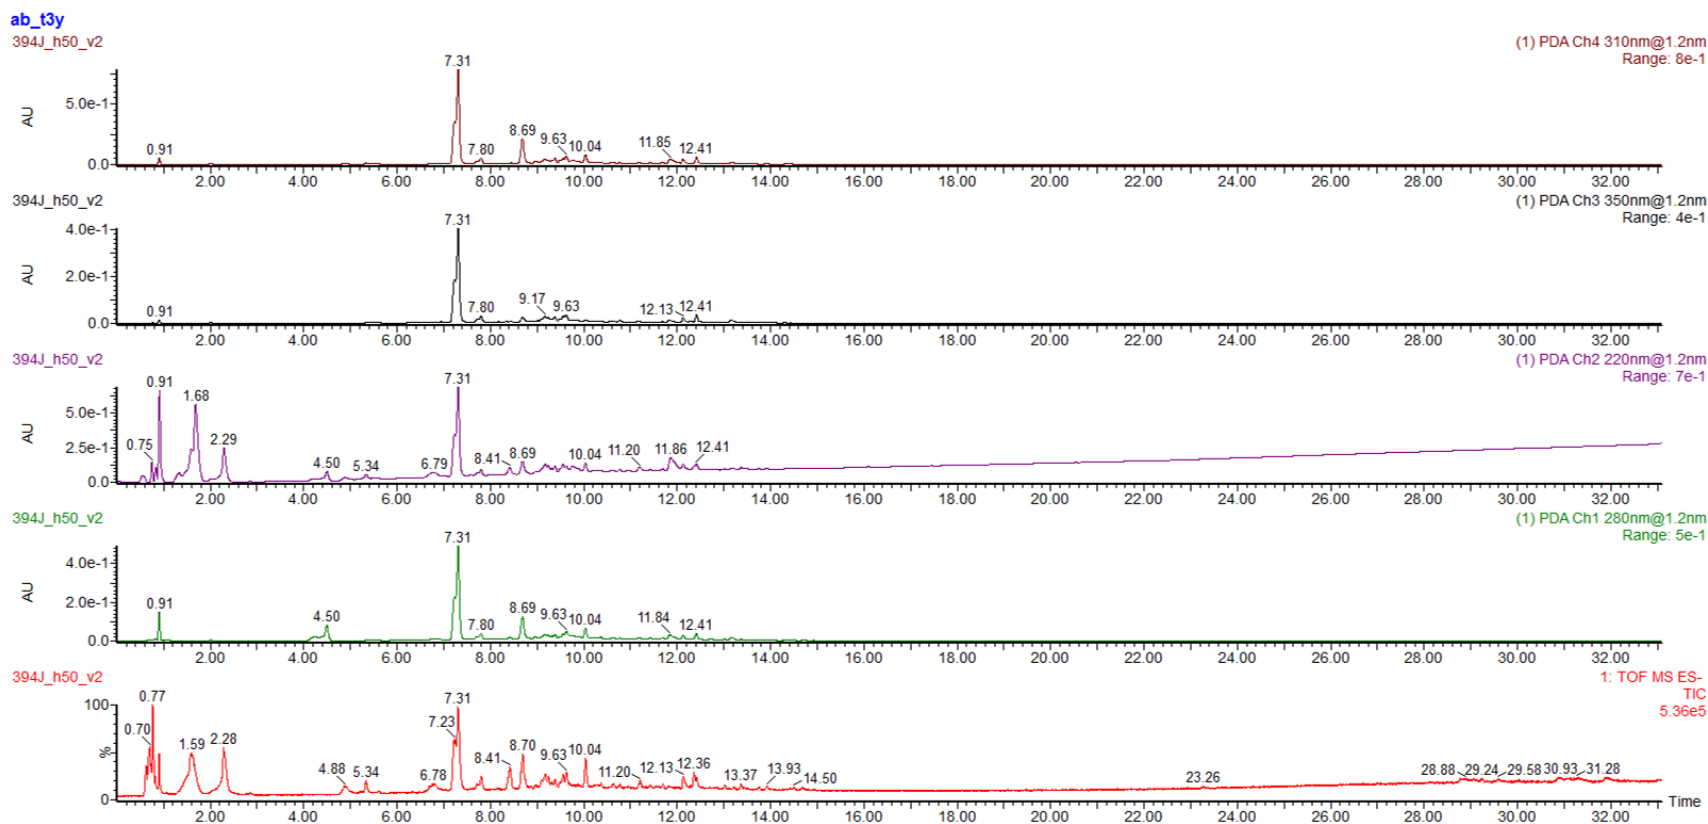

Figure S4a. UPLC-MS and photodiode array (PDA) profiles of the secondary metabolite extract of an *A. blackiana* expanding leaf sample from treatment USUV+. Photodiode array profiles shown are (top to bottom) 310nm, 350nm, 220nm, and 280nm. UPLC-MS and PDA data were collected as described in Methods: Metabolomic analysis of secondary metabolites.

## *Alseis blackiana* High UV Uniform Shade, Mature Leaf

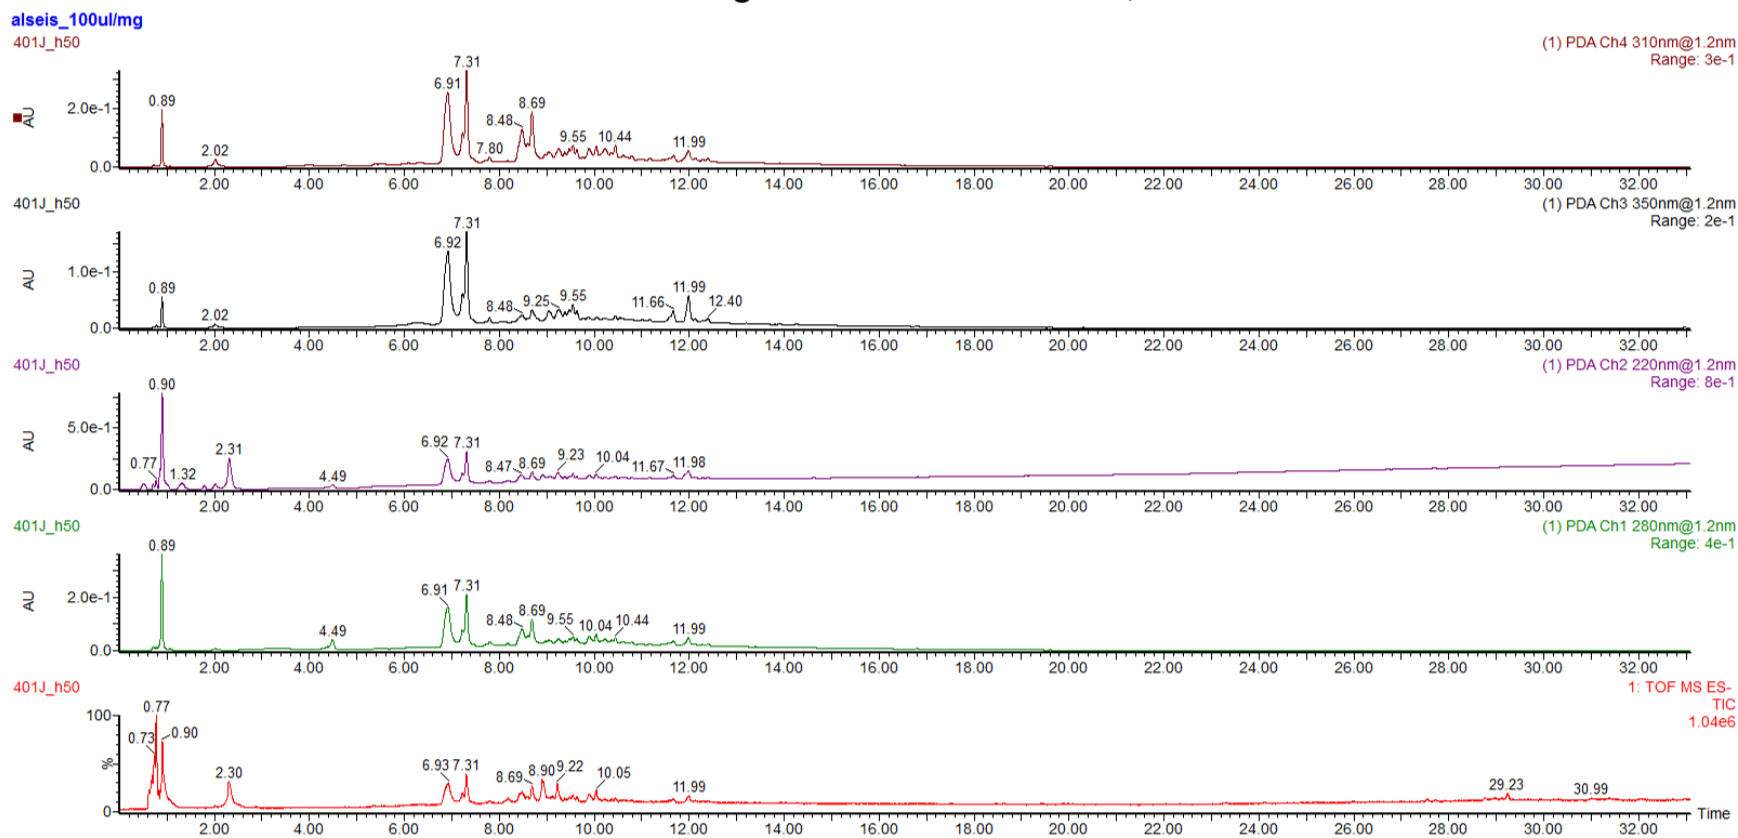

Figure S4b. UPLC-MS and photodiode array (PDA) profiles of the secondary metabolite extract of an *A. blackiana* mature leaf sample from treatment USUV+. Photodiode array profiles shown are (top to bottom) 310nm, 350nm, 220nm, and 280nm. UPLC-MS and PDA data were collected as described in Methods: Metabolomic analysis of secondary metabolites.

### *Alseis blackiana* Low UV Uniform Shade, Expanding Leaf

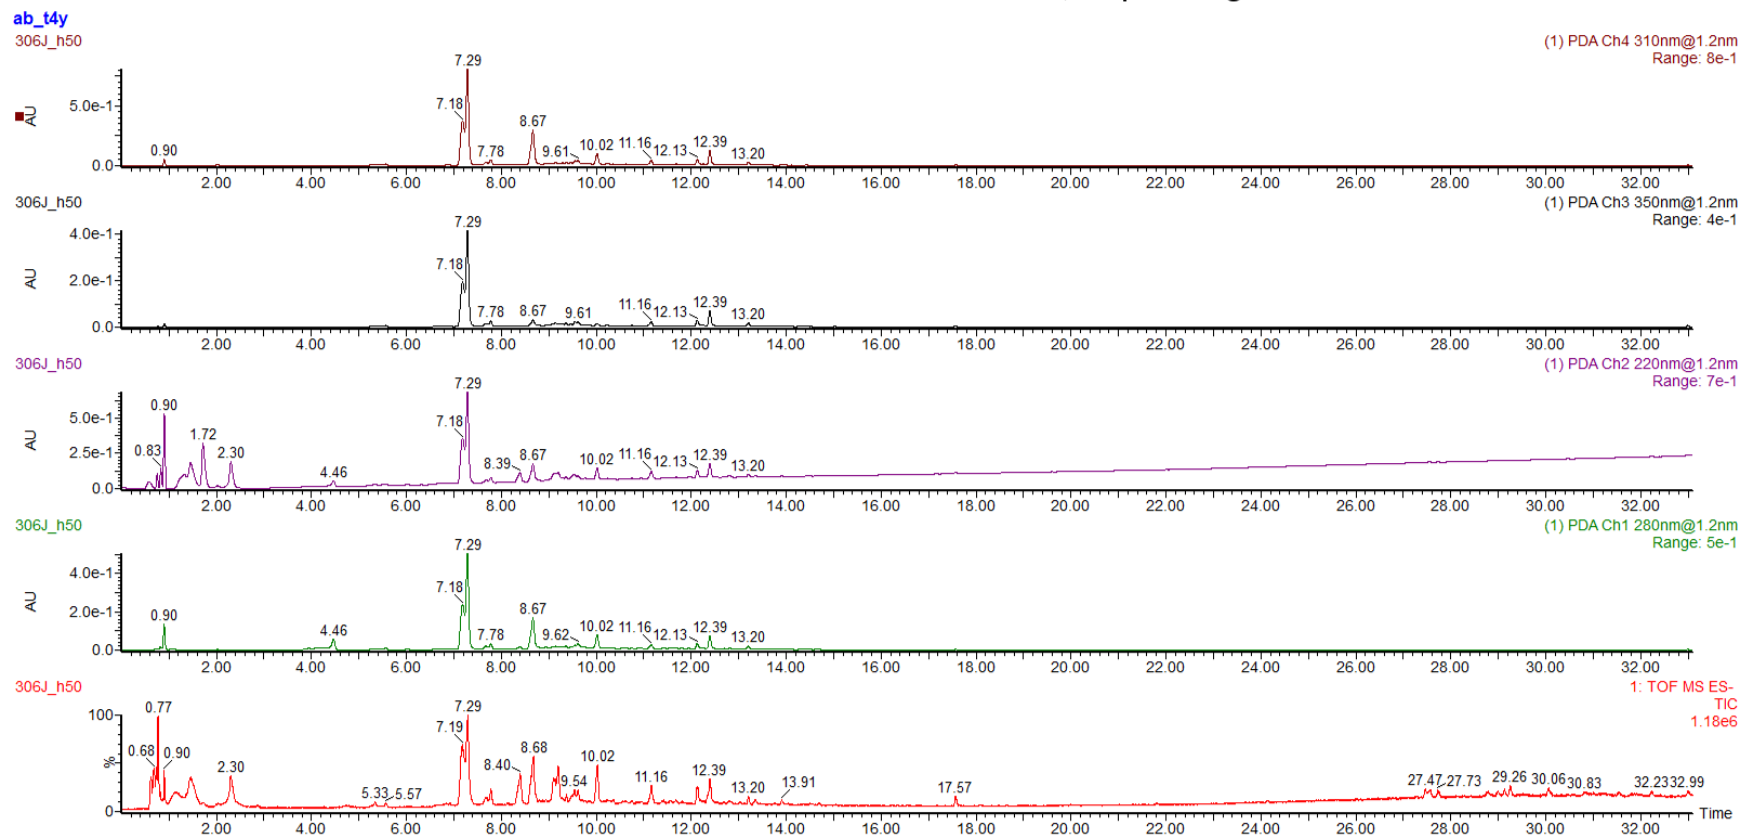

Figure S4c. UPLC-MS and photodiode array (PDA) profiles of the secondary metabolite extract of an *A. blackiana* expanding leaf sample from treatment USUV-. Photodiode array profiles shown are (top to bottom) 310nm, 350nm, 220nm, and 280nm. UPLC-MS and PDA data were collected as described in Methods: Metabolomic analysis of secondary metabolites.

### *Alseis blackiana* Low UV Uniform Shade, Mature Leaf

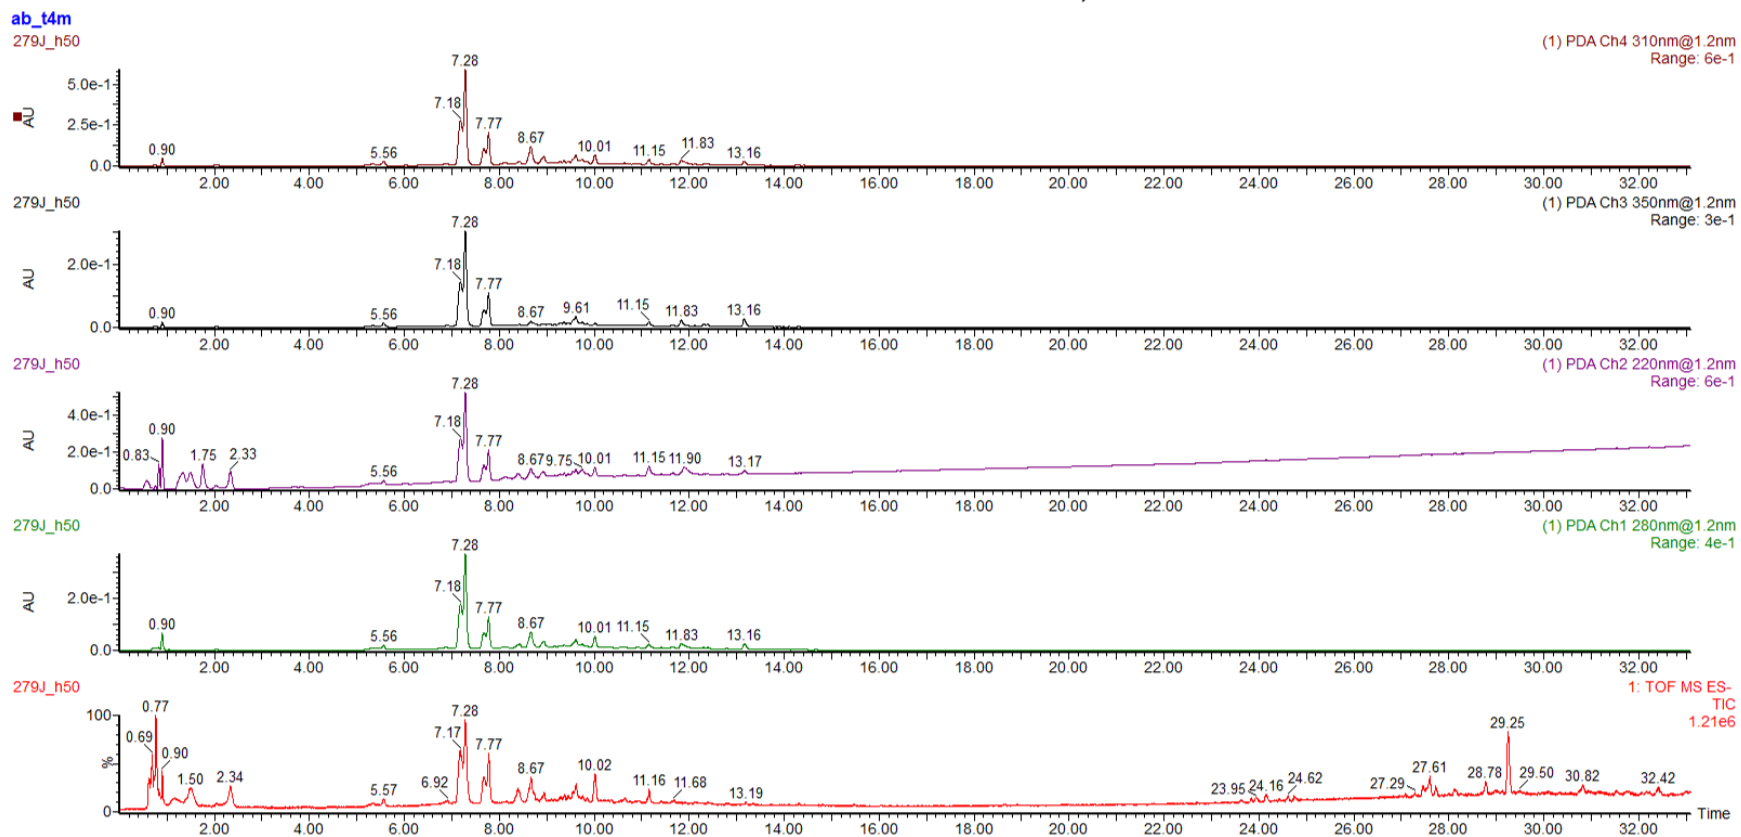

Figure S4d. UPLC-MS and photodiode array (PDA) profiles of the secondary metabolite extract of an *A. blackiana* mature leaf sample from treatment USUV-. Photodiode array profiles shown are (top to bottom) 310nm, 350nm, 220nm, and 280nm. UPLC-MS and PDA data were collected as described in Methods: Metabolomic analysis of secondary metabolites.

### *Alseis blackiana* Sunflecks, Expanding Leaf

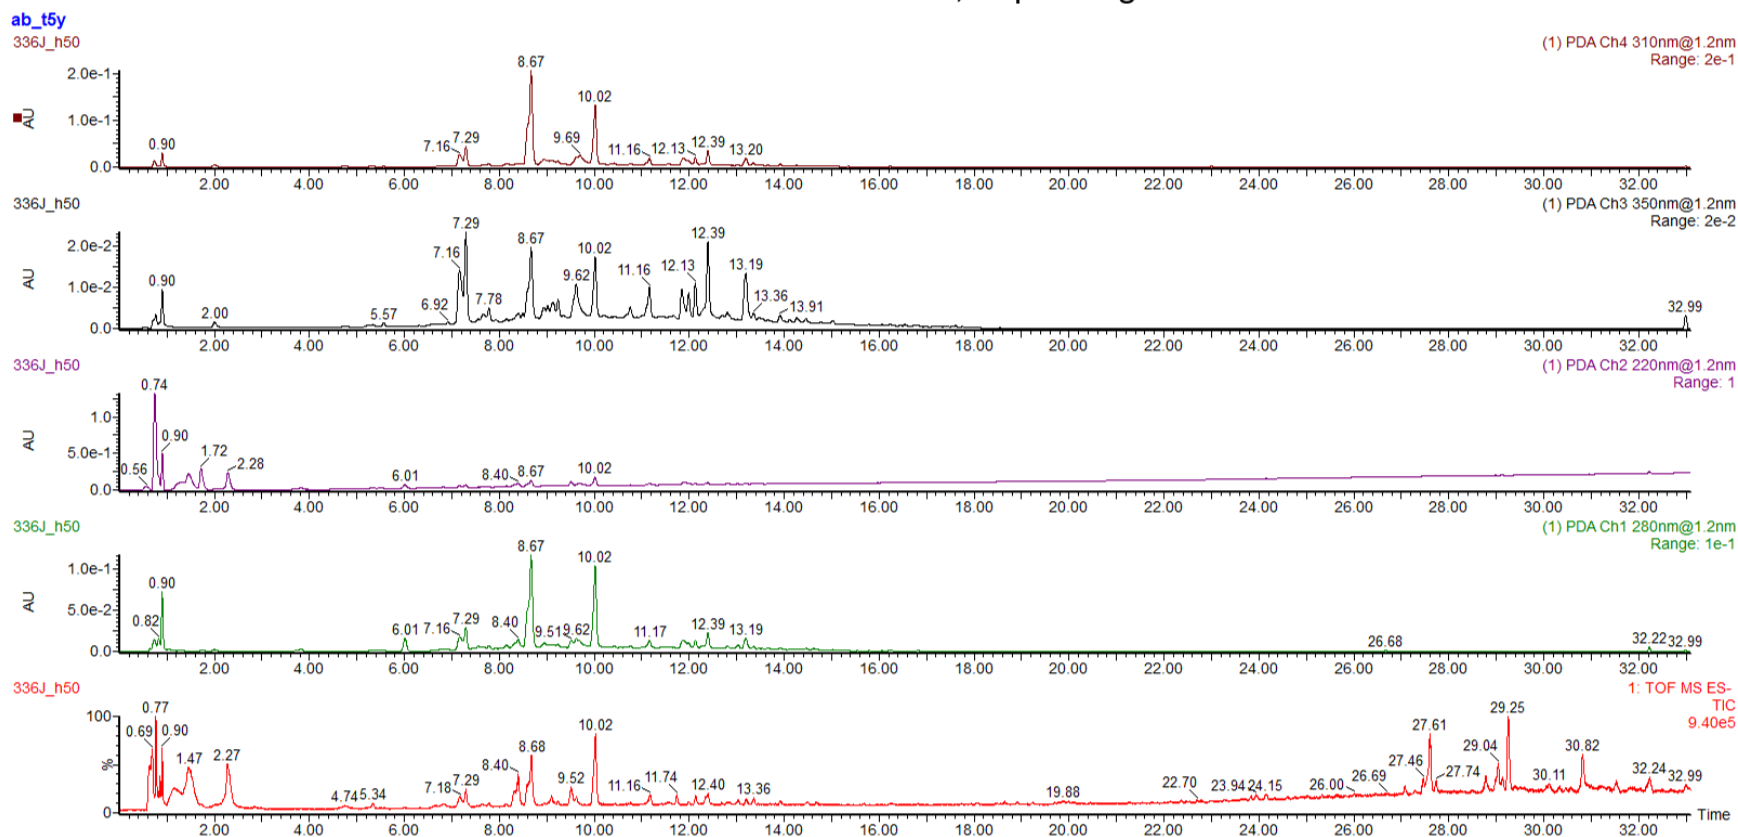

Figure S4e. UPLC-MS and photodiode array (PDA) profiles of the secondary metabolite extract of an *A. blackiana* expanding leaf sample from treatment SF. Photodiode array profiles shown are (top to bottom) 310nm, 350nm, 220nm, and 280nm. UPLC-MS and PDA data were collected as described in Methods: Metabolomic analysis of secondary metabolites.

## *Alseis blackiana* Sunflecks, Mature Leaf

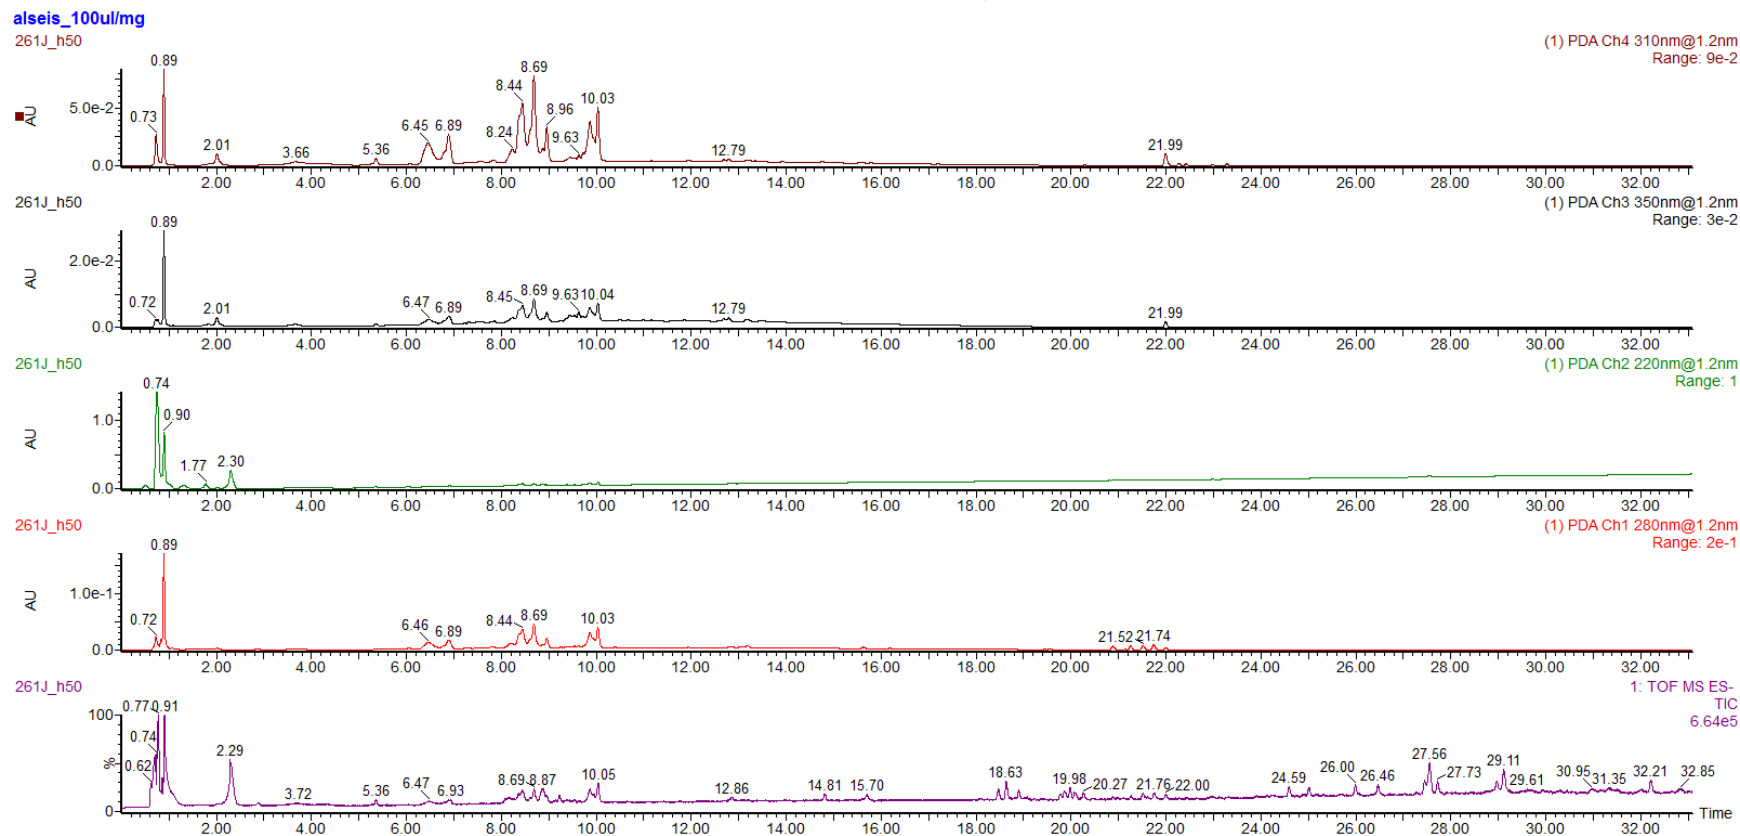

Figure S4f. UPLC-MS and photodiode array (PDA) profiles of the secondary metabolite extract of an *A. blackiana* mature leaf sample from treatment SF. Photodiode array profiles shown are (top to bottom) 310nm, 350nm, 220nm, and 280nm. UPLC-MS and PDA data were collected as described in Methods: Metabolomic analysis of secondary metabolites.

### *Brosimum utile* High UV Uniform Shade, Expanding Leaf

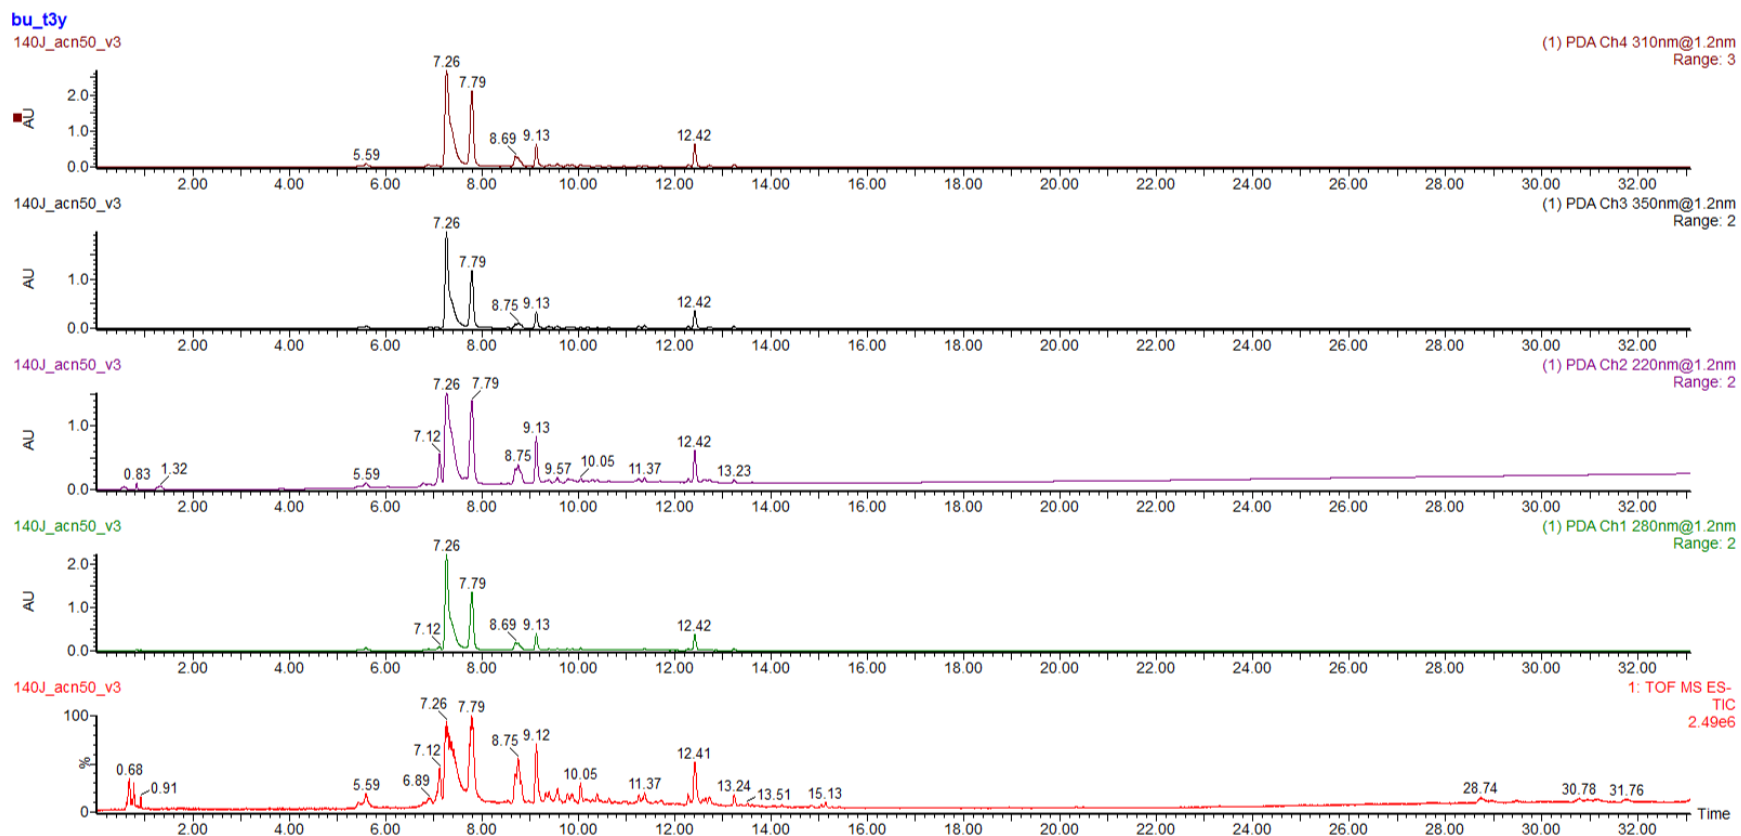

Figure S4g. UPLC-MS and photodiode array (PDA) profiles of the secondary metabolite extract of a *B. utile* expanding leaf sample from treatment USUV+. Photodiode array profiles shown are (top to bottom) 310nm, 350nm, 220nm, and 280nm. UPLC-MS and PDA data were collected as described in Methods: Metabolomic analysis of secondary metabolites.



*Brosimum utile* High UV Uniform Shade, Mature Leaf

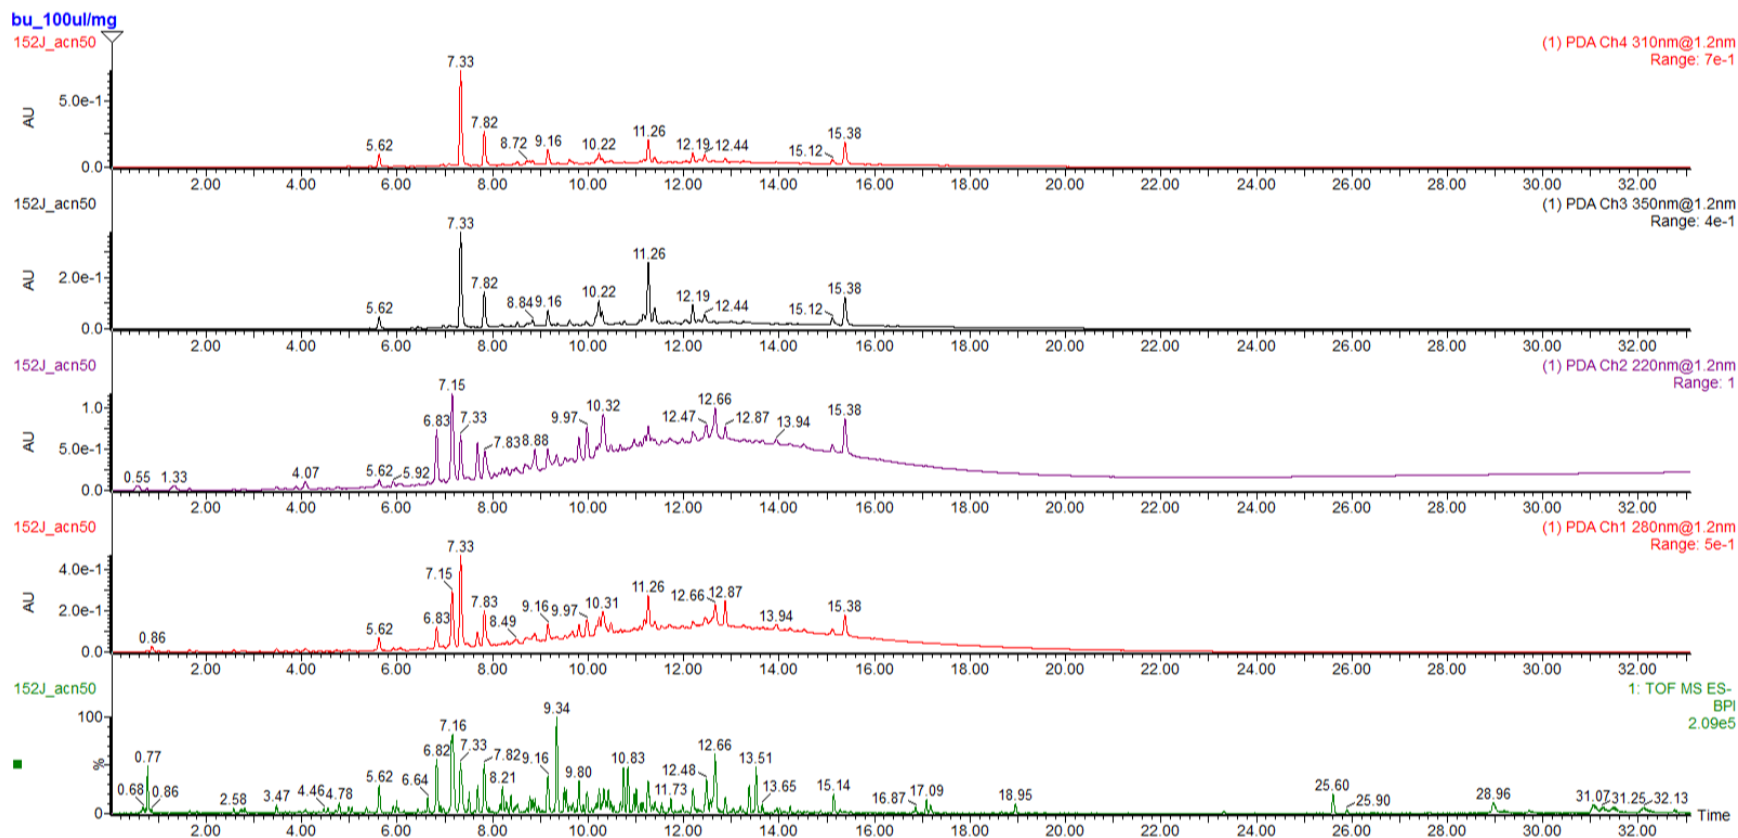

Figure S4h. UPLC-MS and photodiode array (PDA) profiles of the secondary metabolite extract of a *B. utile* mature leaf sample from treatment USUV+. Photodiode array profiles shown are (top to bottom) 310nm, 350nm, 220nm, and 280nm. UPLC-MS and PDA data were collected as described in Methods: Metabolomic analysis of secondary metabolites.

### *Brosimum utile* Low UV Uniform Shade, Expanding Leaf

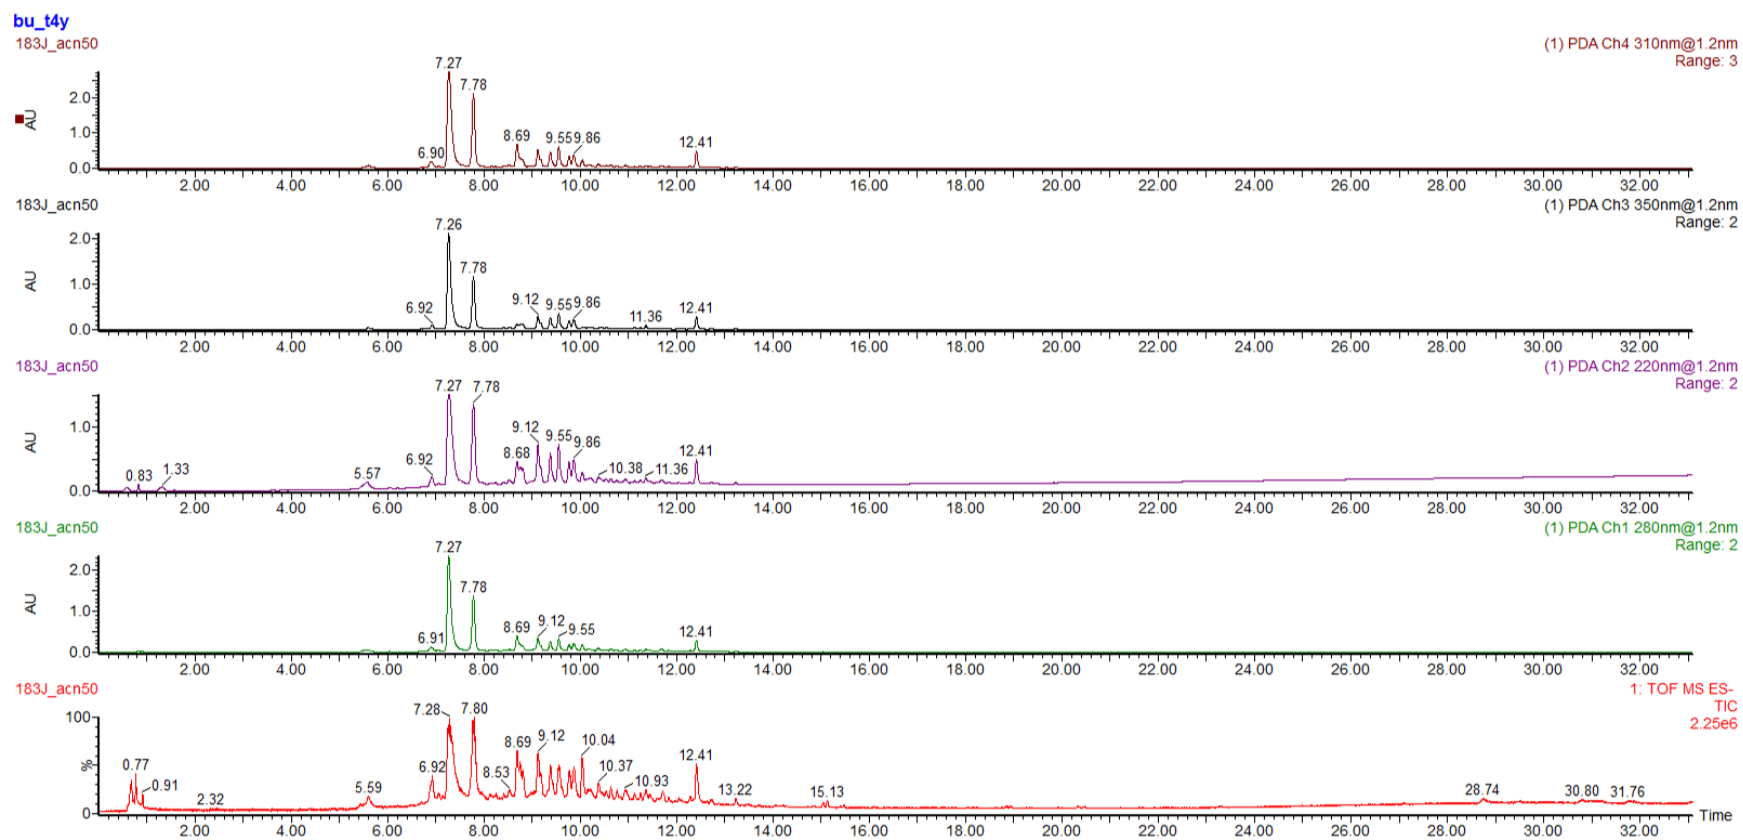

Figure S4i. UPLC-MS and photodiode array (PDA) profiles of the secondary metabolite extract of a *B. utile* expanding leaf sample from treatment USUV-. Photodiode array profiles shown are (top to bottom) 310nm, 350nm, 220nm, and 280nm. UPLC-MS and PDA data were collected as described in Methods: Metabolomic analysis of secondary metabolites.

### *Brosimum utile* Low UV Uniform Shade, Mature Leaf

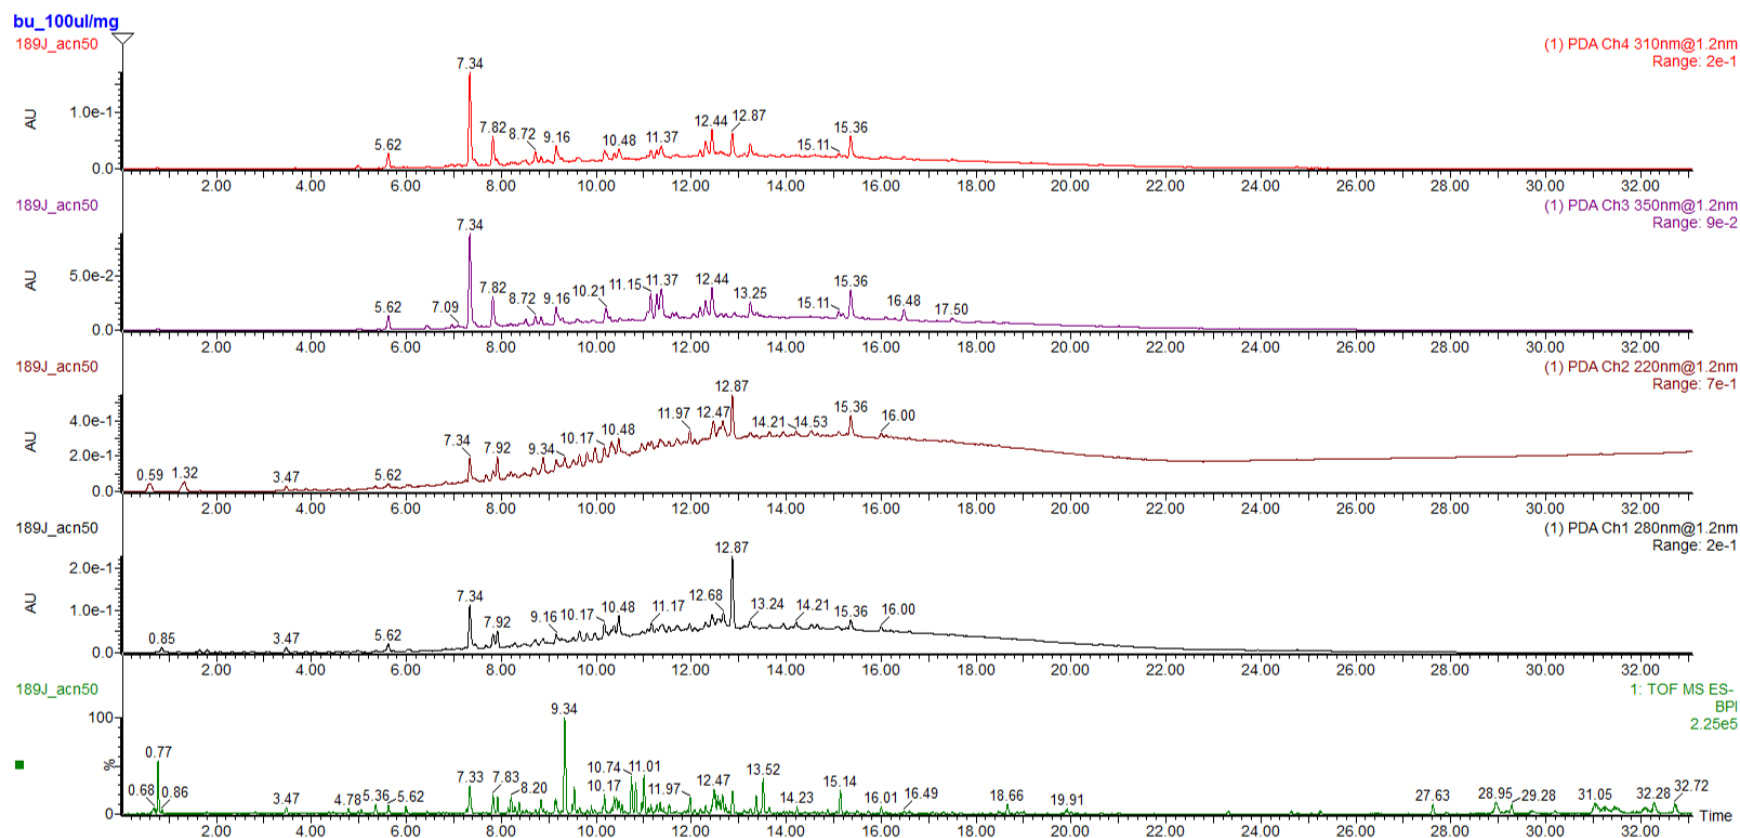

Figure S4j. UPLC-MS and photodiode array (PDA) profiles of the secondary metabolite extract of a *B. utile* mature leaf sample from treatment USUV-. Photodiode array profiles shown are (top to bottom) 310nm, 350nm, 220nm, and 280nm. UPLC-MS and PDA data were collected as described in Methods: Metabolomic analysis of secondary metabolites.

### *Brosimum utile* Sunflecks, Expanding Leaf

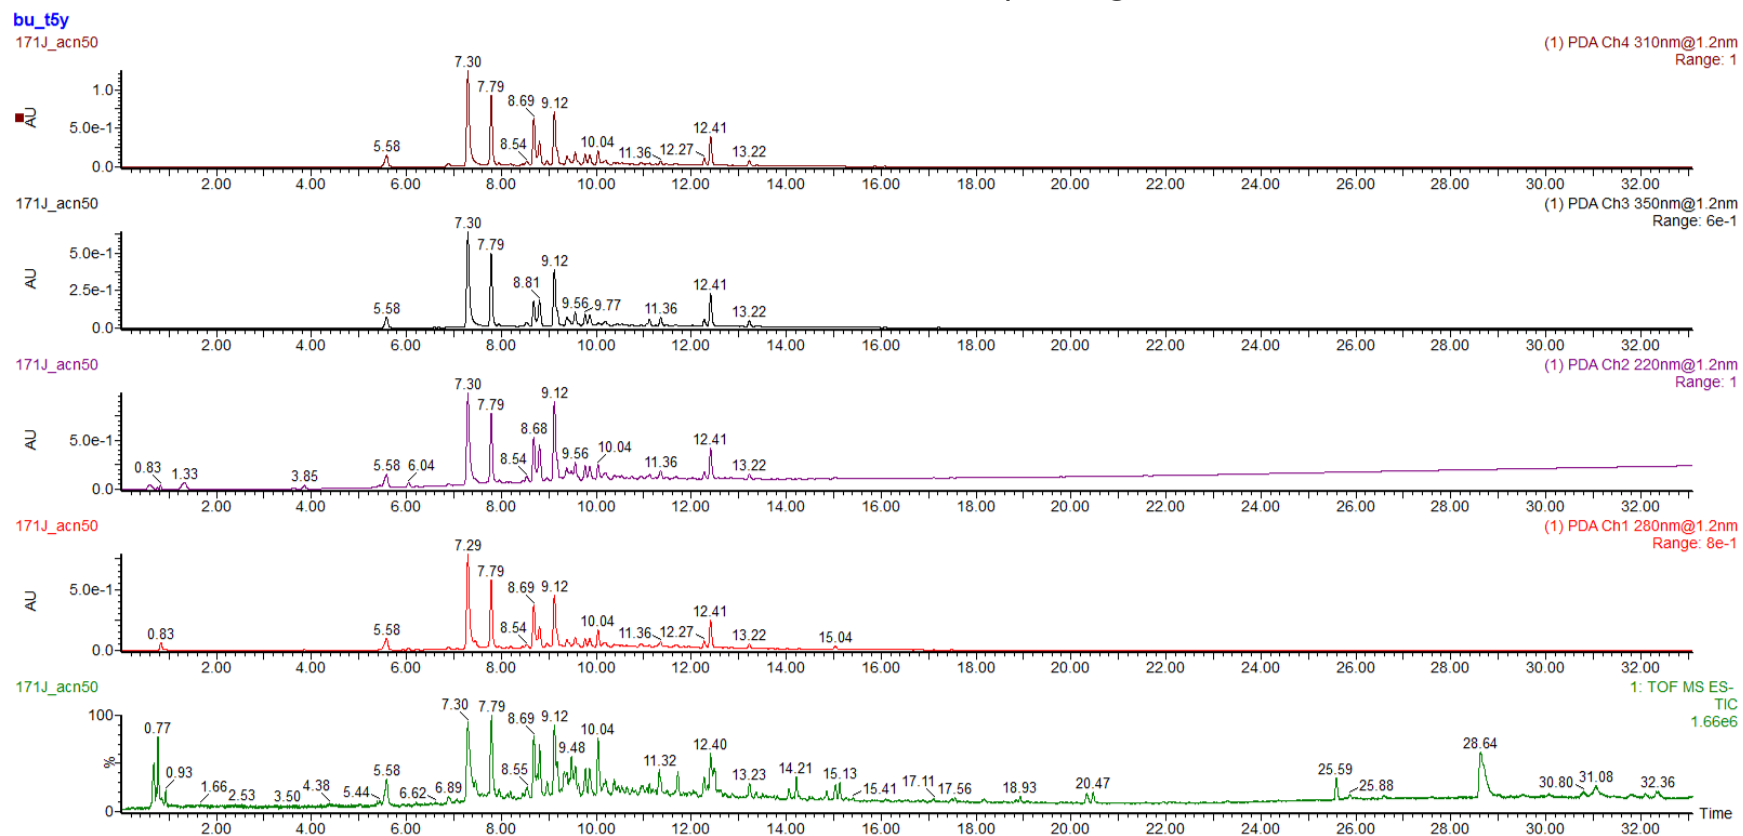

Figure S4k. UPLC-MS and photodiode array (PDA) profiles of the secondary metabolite extract of a *B. utile* expanding leaf sample from treatment SF. Photodiode array profiles shown are (top to bottom) 310nm, 350nm, 220nm, and 280nm. UPLC-MS and PDA data were collected as described in Methods: Metabolomic analysis of secondary metabolites.

## *Brosimum utile* Sunflecks, Mature Leaf

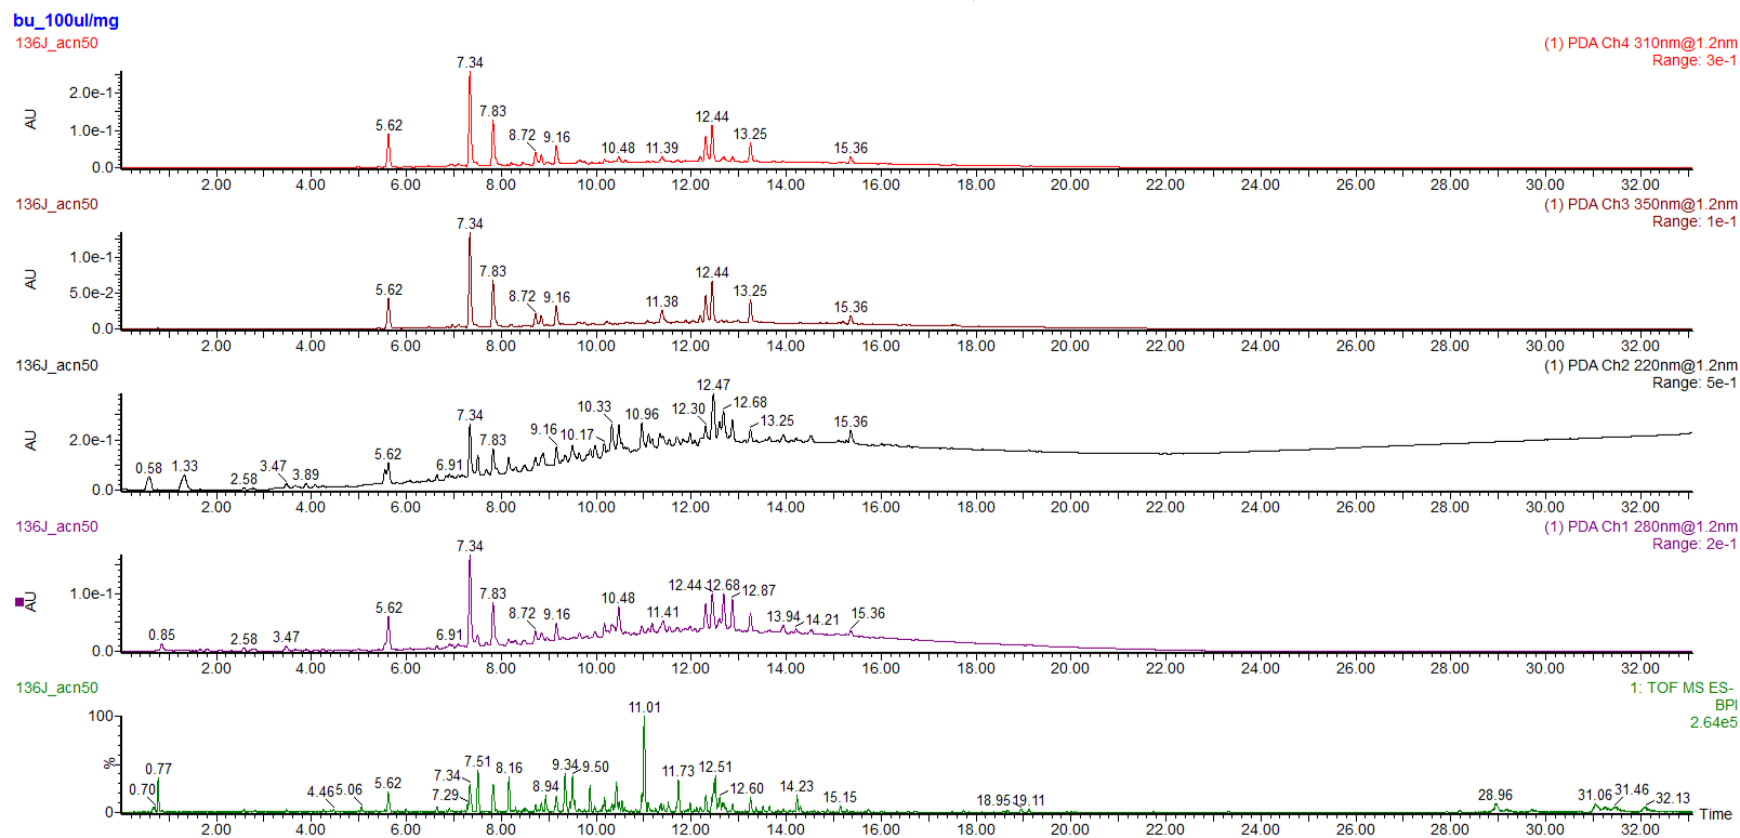

Figure S41. UPLC-MS and photodiode array (PDA) profiles of the secondary metabolite extract of a *B. utile* mature leaf sample from treatment SF. Photodiode array profiles shown are (top to bottom) 310nm, 350nm, 220nm, and 280nm. UPLC-MS and PDA data were collected as described in Methods: Metabolomic analysis of secondary metabolites.
